# Supplementary material
Source: Elsevier journal article supplement (https://www.sciencedirect.com/science/article/pii/S1413355517304379)
Supplement: mmc1 [file S1413355517304379:mmc1.xlsx]

## Sheet: Resistance LET
	Body Height (cm)	Lenght of lever (in % of body height) (PASCHOARELLI, LC., 2009)	Movement	Range of Motion (in degrees)	length of lever (in cm)	initial tubing length (in cm)	elongation (in cm)	elongation (in % of initial length)	Resistance in Newton (#200)	Resistance in Newton (#201)	Resistance in Newton (#202)	Resistance in Newton (#203)	Resistance in Newton (#204)		elongation equation
	150	0.277	Elbow flexion	100	41.55	41.55	54.271	130.616	15.3537	33.5834	51.3467	44.6466	68.3658		-0.4538	207.3	-76.23
		0.277	Elbow extension	90	41.55	41.55	51.6757	124.37	14.9164	32.5846	49.5948	43.1631	66.3611		-0.4538	186.57	-61.7463
		0.445	Shoulder abduction	90	66.75	66.75	83.0169	124.37	14.9164	32.5846	49.5948	43.1631	66.3611		-0.4538	186.57	-61.7463
		0.445	Shoulder flexion	90	66.75	66.75	83.0169	124.37	14.9164	32.5846	49.5948	43.1631	66.3611		-0.4538	186.57	-61.7463
		0.445	Shoulder extension	50	66.75	66.75	56.1626	84.1387	11.6631	25.3665	37.3739	32.7894	51.9396		-0.4538	103.65	-19.0575
		0.445	Shoulder horizontal abduction	90	66.75	66.75	83.0169	124.37	14.9164	32.5846	49.5948	43.1631	66.3611		-0.4538	186.57	-61.7463
		0.445	Shoulder horizontal aduction	90	66.75	66.75	83.0169	124.37	14.9164	32.5846	49.5948	43.1631	66.3611		-0.4538	186.57	-61.7463
		0.445	Abduction in scapular plane	90	66.75	66.75	83.0169	124.37	14.9164	32.5846	49.5948	43.1631	66.3611		-0.4538	186.57	-61.7463
		0.277	Internal shoulder rotation	70	41.55	41.55	44.5846	107.303	13.6322	29.6947	44.6206	38.9438	60.5763		-0.4538	145.11	-37.3527
		0.277	External shoulder rotation	110	41.55	41.55	56.2329	135.338	15.6731	34.3183	52.6485	45.7476	69.8434		-0.4538	228.03	-92.2383
		0.263	Knee flexion	90	39.45	39.45	49.0639	124.37	14.9164	32.5846	49.5948	43.1631	66.3611		-0.4538	186.57	-61.7463
		0.263	Knee extension	90	39.45	39.45	49.0639	124.37	14.9164	32.5846	49.5948	43.1631	66.3611		-0.4538	186.57	-61.7463
		0.558	Hip flexion	80	83.7	83.7	97.5934	116.599	14.3483	31.2987	47.3652	41.273	63.7844		-0.4538	165.84	-48.7872
		0.558	Hip extension	30	83.7	83.7	45.9308	54.8755	8.7632	19.1627	27.2671	24.2172	39.579		-0.4538	62.19	-6.8607
		0.558	Hip abduction	45	83.7	83.7	64.7793	77.3946	11.0373	24.0126	35.1447	30.8967	49.2412		-0.4538	93.285	-15.4366
		0.558	Hip aduction	30	83.7	83.7	45.9308	54.8755	8.7632	19.1627	27.2671	24.2172	39.579		-0.4538	62.19	-6.8607
		0.263	Hip internal rotation	50	39.45	39.45	33.1927	84.1387	11.6631	25.3665	37.3739	32.7894	51.9396		-0.4538	103.65	-19.0575
		0.263	Hip external rotation	40	39.45	39.45	27.7213	70.2694	10.3491	22.5338	32.7265	28.8445	46.2948		-0.4538	82.92	-12.1968
		Enter value	Movement of your preference	Enter value	#VALUE!	#VALUE!	#VALUE!	#VALUE!	#VALUE!	#VALUE!	#VALUE!	#VALUE!	#VALUE!		-0.4538	#VALUE!	#VALUE!
		Enter value	Movement of your preference	Enter value	#VALUE!	#VALUE!	#VALUE!	Enter value	#VALUE!	#VALUE!	#VALUE!	#VALUE!	#VALUE!
